# Supplementary material for: Rb4Li2TiOGe4O12: a novel high-performance titanyl germanate anode for Li-ion batteries
Source: Royal Society of Chemistry journal article supplement (doi:10.1039/d2ta09078c), 2023-01-01
Supplement: d2ta09078c1.pdf [file d2ta09078c1.pdf]

## Supplemental information

# **Rb<sub>4</sub>Li<sub>2</sub>TiOGe<sub>4</sub>O<sub>12</sub>: a novel high-performance titanyl germanate anode for Li-ion batteries**

Chuan Tang<sup>a,c</sup>, Siliang Chang<sup>b</sup>, Qian Wu<sup>a,\*</sup>, Lei Kang<sup>a</sup>, Kai Feng<sup>b,\*</sup>, Xianghe Meng<sup>a</sup>,  
Shengqi Chu<sup>c</sup>, Hongwei Huang<sup>d</sup>, and Mingjun Xia<sup>a,\*</sup>

<sup>a</sup> *Beijing Center for Crystal Research and Development, Key Laboratory of functional Crystals and Laser Technology, Technical Institute of Physics and Chemistry, Chinese Academy of Sciences, Beijing 100190, China*

<sup>b</sup> *College of Chemistry and Chemical Engineering, Yantai University, Yantai 264005, China*

<sup>c</sup> *Beijing Synchrotron Radiation Facility, Institute of High Energy Physics, Chinese Academy of Sciences, Beijing 100049, China*

<sup>d</sup> *School of Materials Science and Technology, China University of Geosciences, Beijing 100083, China*

<sup>e</sup> *College of Optoelectronic Technology, Chengdu University of Information Technology, Chengdu 610225, China*

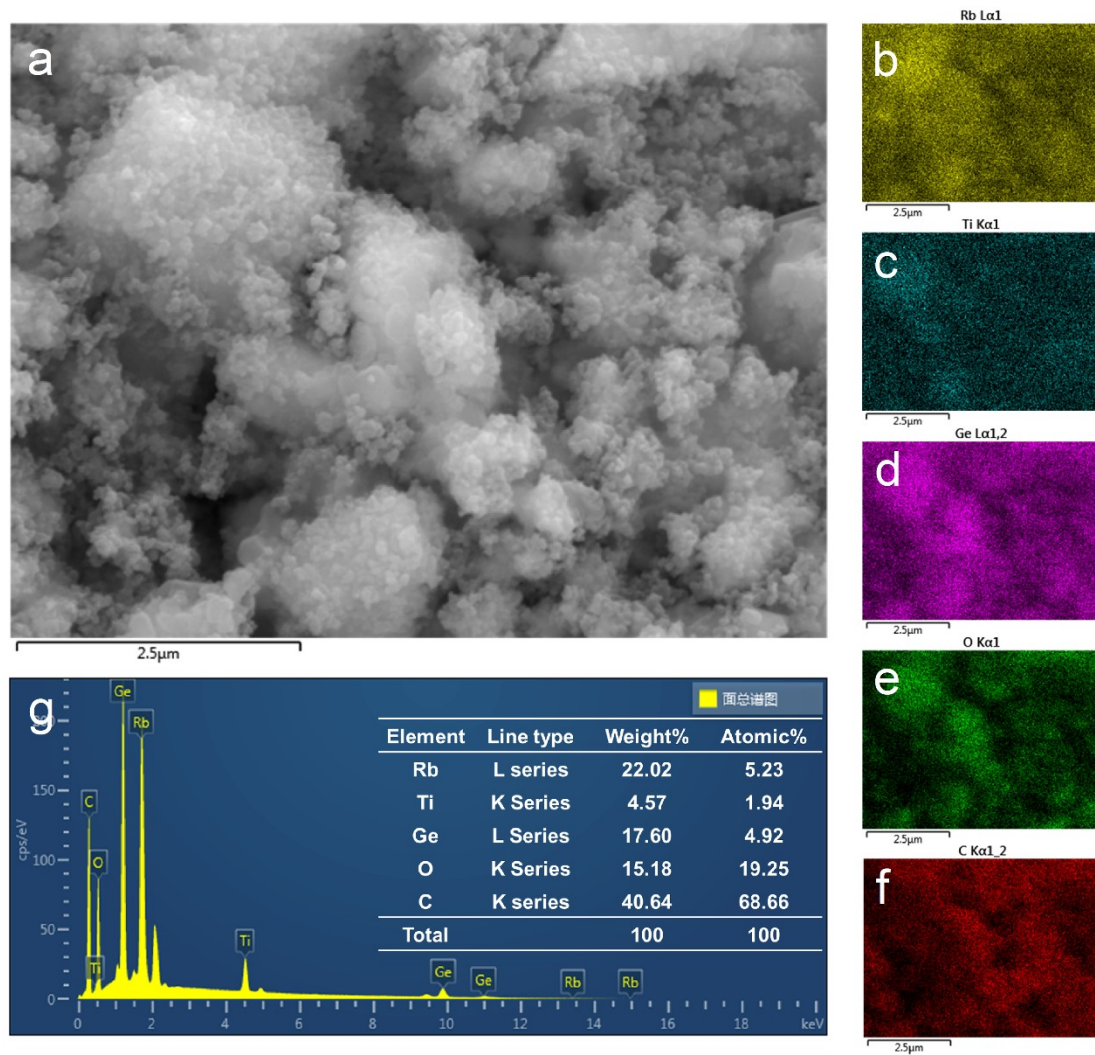

**Fig. S1.** (a) SEM image of the RL TG/C, (b-f) EDS elemental mapping of Rb, Ti, Ge, O and C, respectively, and (g) EDS elemental ratio of RL TG/C.

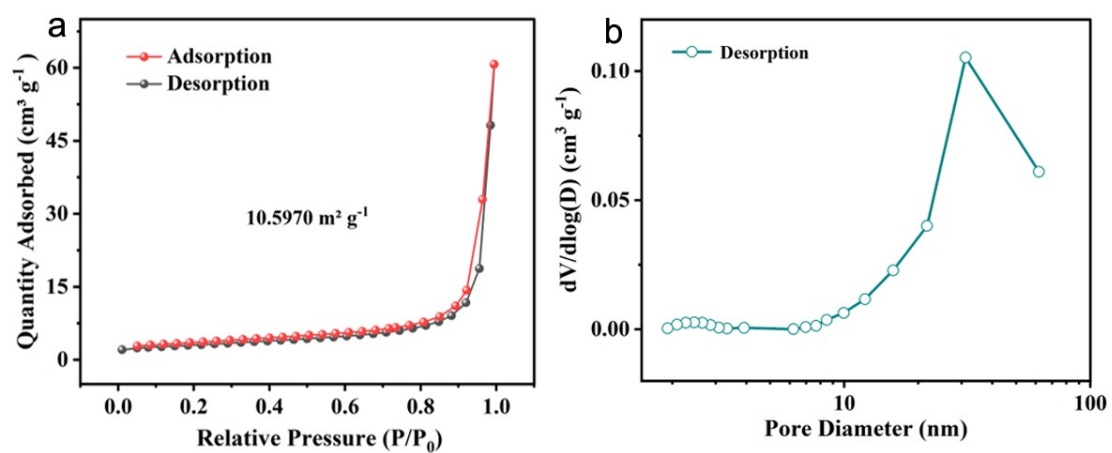

**Fig. S2.** (a) N<sub>2</sub> adsorption and desorption isotherms and (b) pore size distribution of the RL TG/C.

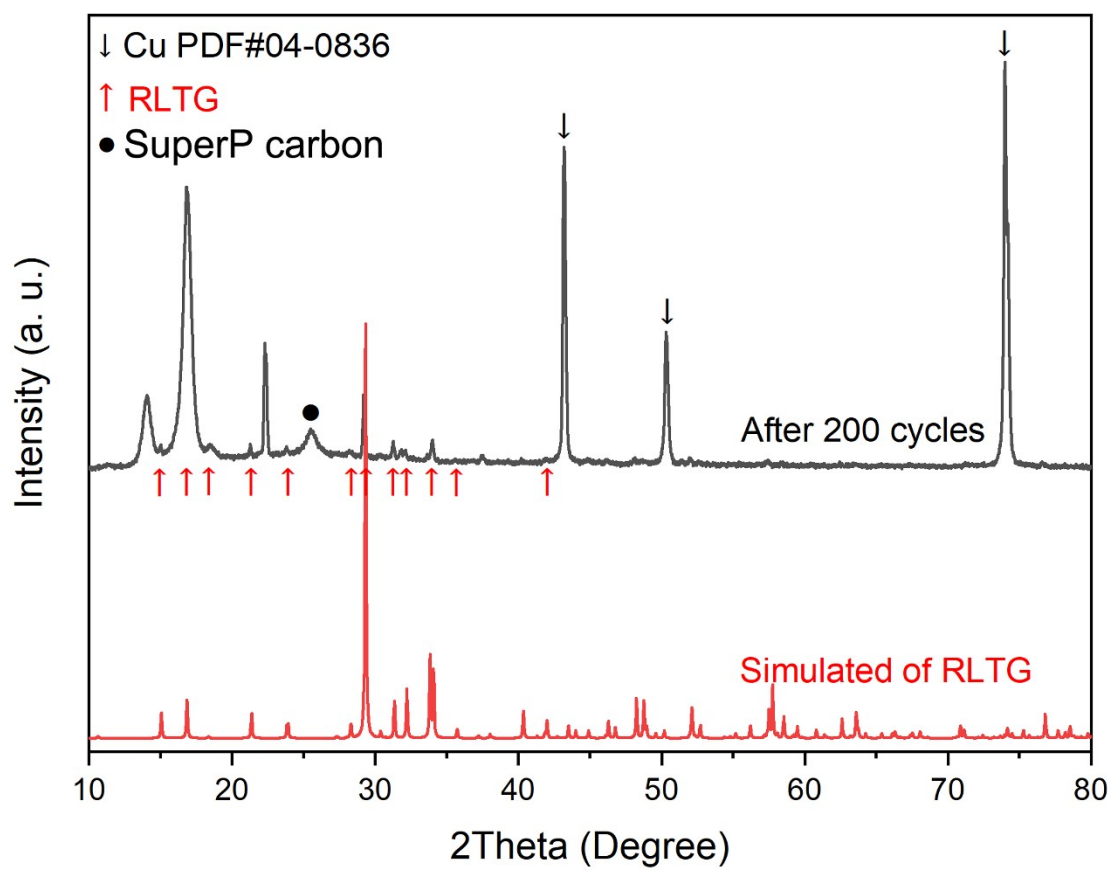

**Fig. S3.** XRD pattern of RL TG/C anode after 200 cycles compared with the simulated XRD pattern of RL TG.

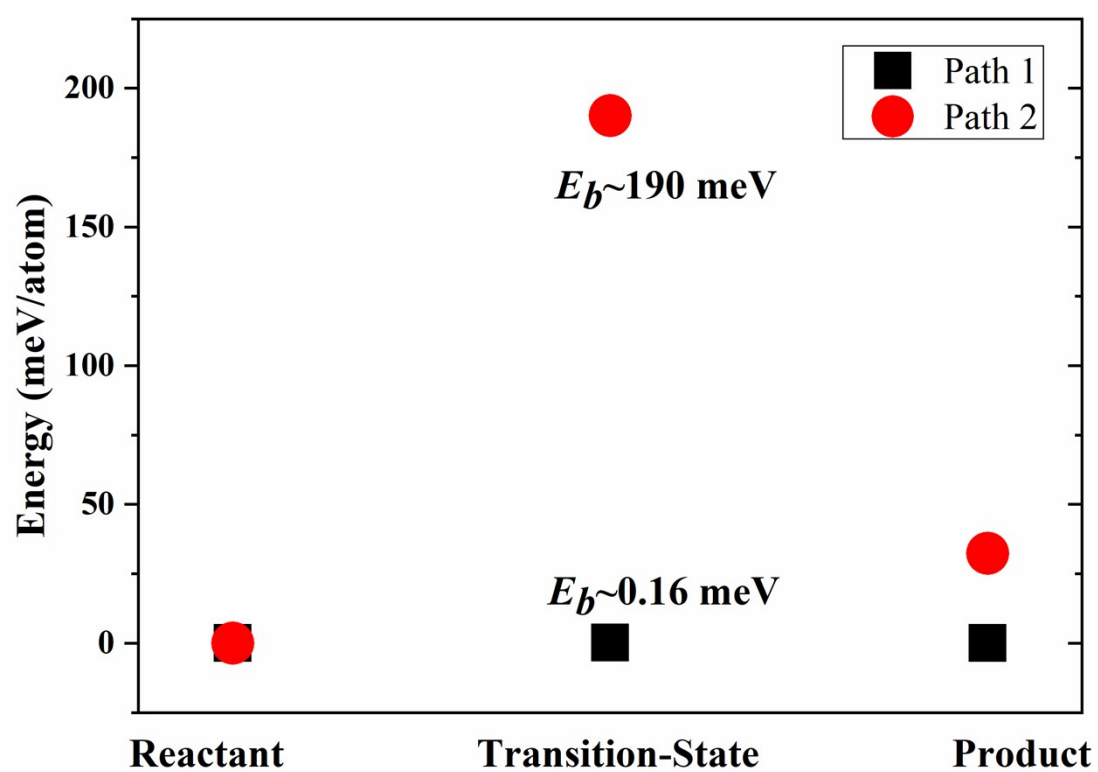

**Fig S4.** The barriers for two different migration paths.
